# Supplementary material
Source: HighWire-hosted journal article supplement (https://bmjopen.bmj.com/content/12/4/e057874)
Supplement: inline-supplementary-material-1 [file inline-supplementary-material-1.pdf]

## Appendix

### **\*Appendix 1 here\***

#### Health Board and Trust Distribution

Distribution of responses per Health Board and Trust within Wales.

### **\*Appendix 2 here\***

#### Breakdown of Primary, Secondary and Community Care responses

Primary Care responses.

### **\*Appendix 3 here\***

Secondary and Community Care responses.

#### Patient and Clinician Demographics

##### Clinician Professions

### **\*Appendix 4 here\***

##### Clinician Specialities

### **\*Appendix 5 here\***

##### Patient Age

### **\*Appendix 6 here\***

**Patient Gender****\*Appendix 7 here\*****Patient Ethnicity****\*Appendix 8 here\*****Patient Household Income****\*Appendix 9 here\***
