# Supplementary material
Source: HighWire-hosted journal article supplement (https://bmjopen.bmj.com/content/12/4/e057874)
Supplement: inline-supplementary-material-12 [file inline-supplementary-material-12.pdf]

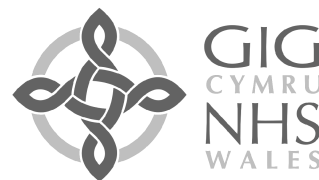

## Video Consulting Clinician Copy

### Survey 1:

1. Please rate the quality of your video consultation? Rhowch sgôr i ansawdd eich galwad fideo?

Poor Gwael

Okay Iawn

Good Da

Very Good Da iawn

Excellent Ardderchog

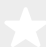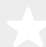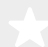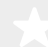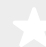

Comments?

2. What is your profession & speciality? Beth yw eich proffesiwn ac arbenigedd?

**Please only enter 'other' if your profession/speciality is not on the list.**

Profession Proffesiwn

Speciality Arbenigedd

Profession & Speciality

Proffesiwn &

Arbenigedd

Other (please specify)

**3. What do you consider was the primary activity of this video consultation?**

Beth oedd y prif weithgaredd yn yr ymgynghoriad fideo?

- |                                                          |                                                                              |
|----------------------------------------------------------|------------------------------------------------------------------------------|
| <input type="radio"/> First Appointment apwyntiad cyntaf | <input type="radio"/> Advice & Support cyngor a chymorth                     |
| <input type="radio"/> Follow-up dilyniant                | <input type="radio"/> Feedback/Outcomes/Results adborth/ allbwn/ canlyniadau |
| <input type="radio"/> Review adolygiad                   | <input type="radio"/> Discharge rhyddhad                                     |
| <input type="radio"/> Therapy Session sesiwn therapi     |                                                                              |
| <input type="radio"/> Other (please specify)             |                                                                              |

**4. Do you feel that this video consultation prevented the patient needing a face-to-face appointment?**

Wnaeth yr ymgynghoriad fideo osgoi'r angen i'r claf gael apwyntiad wyneb i wyneb?

- ☐ Yes Ie
- ☐ No na
- ☐ Unable to say Methu dweud

Other (please specify)

**5. Which Health Board Region are you in? O ba Ranbarth Bwrdd Iechyd ydych chi'n dod?**

- |                                                                 |                                                           |
|-----------------------------------------------------------------|-----------------------------------------------------------|
| <input type="radio"/> Aneurin Bevan University Health Board     | <input type="radio"/> Hywel Dda University Health Board   |
| <input type="radio"/> Betsi Cadwaladr University Health Board   | <input type="radio"/> Powys Teaching Health Board         |
| <input type="radio"/> Cardiff & Vale University Health Board    | <input type="radio"/> Swansea Bay University Health Board |
| <input type="radio"/> Cwm Taf Morgannwg University Health Board | <input type="radio"/> Velindre Cancer Centre              |

**6. ONLY ANSWER THIS QUESTION IF WORKING FROM HOME**

If you are working remotely, how long in minutes and miles would it typically take you to travel from home to work? (one-way)

**Use numbers only e.g., 10 (for minutes and/or £ in expenses)**

Minutes

Miles (if known)

**7. Any other comments, questions or concerns?**

Unrhyw sylwadau, cwesytynau neu bryderon eraill?

*For example, is there additional support you may need? Or could anything be improved with the platform?*

8. TEC Cymru's researchers will be running interviews with clinicians. Please leave your email below if you would like to take part, and we will contact you to arrange a date and time.

**Email Address**

**CONSENT:**

By submitting this survey I provide full consent for the data provided to be used anonymously in publications and presentations by the TEC Cymru team working in the NHS.

Tick Box { }

**Survey 2: (Additional Questions Added)**

9. Did you experience any issues or difficulties with your video consultation today? A wnaethoch chi brofi unrhyw broblemau neu anawsterau gyda'ch ymgynghoriad fideo heddiw?

|                                                                                                                           | Very relevant         | Relevant              | Quite relevant        | Not relevant          | Not at all relevant   | N/A                   |
|---------------------------------------------------------------------------------------------------------------------------|-----------------------|-----------------------|-----------------------|-----------------------|-----------------------|-----------------------|
| Issues with a device<br>Mynediad at ddyfais                                                                               | <input type="radio"/> |
| Issues with Internet connection<br>Cysylltedd gwael â'r rhyngwrwyd                                                        | <input type="radio"/> |
| Issues with video/picture<br>Problemau gyda fideo                                                                         | <input type="radio"/> |
| Issues with audio/sound<br>Problemau gyda sain                                                                            | <input type="radio"/> |
| Issues on the patients side e.g., their device, Internet or lack of confidence using video<br>Problemau gydag ochr y claf | <input type="radio"/> |
| I lack the confidence using video consultation<br>Diffyg hyder wrth ddefnyddio galwadau fideo                             | <input type="radio"/> |
| Not suitable for clinical needs<br>Ddim yn briodol neu'n addas                                                            | <input type="radio"/> |
| I prefer face to face or telephone<br>Mae'n well gen i wyneb yn wyneb neu dros y ffôn                                     | <input type="radio"/> |
| The patient prefers face to face or telephone<br>Mae'r claf yn cyfeirio wyneb yn wyneb neu dros y ffôn                    | <input type="radio"/> |

Other (please specify)

10. What do you consider to be the benefits of your work or your service of using video consultation today? Beth yn eich barn chi yw buddion eich gwaith neu'ch gwasanaeth o ddefnyddio ymgynghoriad fideo heddiw?

|                                                                                                              | Very beneficial<br>Buddiol iawn | Beneficial<br>Buddiol | Quite beneficial<br>Eithaf Buddiol | Not beneficial<br>Dim yn Buddiol | Not at all<br>beneficial<br>Dim yn Buddiol o gwbl | N/A                   |
|--------------------------------------------------------------------------------------------------------------|---------------------------------|-----------------------|------------------------------------|----------------------------------|---------------------------------------------------|-----------------------|
| More efficient use of clinical time & space<br>Defnydd mwy effeithlon o amser a lle                          | <input type="radio"/>           | <input type="radio"/> | <input type="radio"/>              | <input type="radio"/>            | <input type="radio"/>                             | <input type="radio"/> |
| Saved travel & parking<br>Arbed teithio a pharcio                                                            | <input type="radio"/>           | <input type="radio"/> | <input type="radio"/>              | <input type="radio"/>            | <input type="radio"/>                             | <input type="radio"/> |
| Saved the environment<br>e.g., less paper waste, co2 emissions<br>Arbed yr amgylchedd ac allbwn co2 a phapur | <input type="radio"/>           | <input type="radio"/> | <input type="radio"/>              | <input type="radio"/>            | <input type="radio"/>                             | <input type="radio"/> |
| Improved access to care for patient<br>Gwellu mynediad i ofal am y claf                                      | <input type="radio"/>           | <input type="radio"/> | <input type="radio"/>              | <input type="radio"/>            | <input type="radio"/>                             | <input type="radio"/> |
| Reduced waiting times for patient<br>Lleihau amseroedd aros i'r claf                                         | <input type="radio"/>           | <input type="radio"/> | <input type="radio"/>              | <input type="radio"/>            | <input type="radio"/>                             | <input type="radio"/> |
| Reduced likelihood of a DNA<br>Lleihau'r siawns o DNA                                                        | <input type="radio"/>           | <input type="radio"/> | <input type="radio"/>              | <input type="radio"/>            | <input type="radio"/>                             | <input type="radio"/> |
| Improved family involvement & support for patient<br>Gwellu cymorth a chyfranogiad i'r claf                  | <input type="radio"/>           | <input type="radio"/> | <input type="radio"/>              | <input type="radio"/>            | <input type="radio"/>                             | <input type="radio"/> |
| Lowered rates of infection risk<br>Lleihau'r gyfradd heintiad                                                | <input type="radio"/>           | <input type="radio"/> | <input type="radio"/>              | <input type="radio"/>            | <input type="radio"/>                             | <input type="radio"/> |
| Other (please specify)                                                                                       | <div></div>                     |                       |                                    |                                  |                                                   |                       |

**CONSENT:**

By submitting this survey I provide full consent for the data provided to be used anonymously in publications and presentations by the TEC Cymru team working in the NHS.

Tick Box { }
